# Supplementary material for: Comparison of the Effects of Ezetimibe-Statin Combination Therapy on Major Adverse Cardiovascular Events in Patients with and without Diabetes: A Meta-Analysis
Source: PubMed Central journal article supplement — Endocrinol Metab (Seoul). 2018 May 4;33(2):219–27. doi: 10.3803/EnM.2018.33.2.219 (PMC6021322; doi:10.3803/enm.2018.33.2.219), 2018-05-04
Supplement: enm-33-219-s002.pdf [file enm-33-219-s002.pdf]

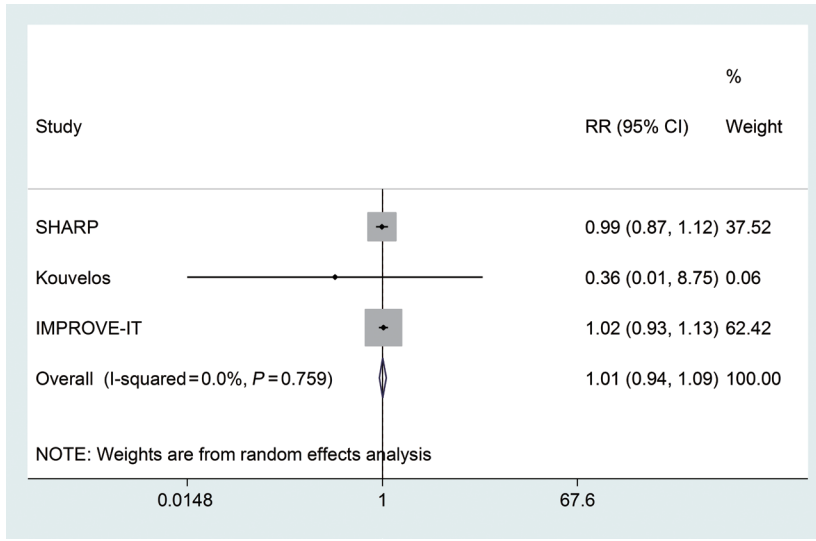

**Supplemental Fig. S2.** Risk ratios (RRs) for newly-developed cancer. The pooled RR is plotted using the empty diamond. The box size is proportional to the weight of each study. CI, confidence interval; SHARP, the Study of Heart and Renal Protection; IMPROVE-IT, the Improved Reduction of Outcomes: Vytorin Efficacy International Trial.
